# Supplementary material for: Electromyographic Analysis of Exercises on a Gymnastic Horse and a Walking Horse: A Pilot Study
Source: MDPI journal article supplement (doi:10.3390/app112311352), 2021-11-30
Supplement: s1 [file s1]

# Electromyographic Analysis of Exercises on a Gymnastic Horse and a Walking Horse: A Pilot Study

Barbora Pyšková <sup>1,2,3,\*</sup>, Tereza Nováková <sup>3</sup>, Radka Bačáková <sup>4</sup> and Miloslav Vilímek <sup>5</sup>

<sup>1</sup> Department of Anatomy and Biomechanics, Faculty of Physical Education and Sport, Charles University, CZ 162 52, Prague, Czech Republic

<sup>2</sup> Bodytherapist, Klánovická 487, CZ 198 00 Prague, Czech Republic

<sup>3</sup> Department of Physiotherapy, Faculty of Physical Education and Sport, Charles University, CZ 162 52 Prague, Czech Republic; novakova@ftvs.cuni.cz

<sup>4</sup> Department of Outside Sports, Faculty of Physical Education and Sport, Charles University, CZ 162 52 Prague, Czech Republic; bacakova@ftvs.cuni.cz

<sup>5</sup> Laboratory of Biomechanics, Department of Mechanics, Biomechanics and Mechatronics, Faculty of Mechanical Engineering, Czech Technical University in Prague, CZ 166 36 Prague, Czech Republic; miloslav.vilimek@fs.cvut.cz

\* Correspondence: pyskovax@ftvs.cuni.cz

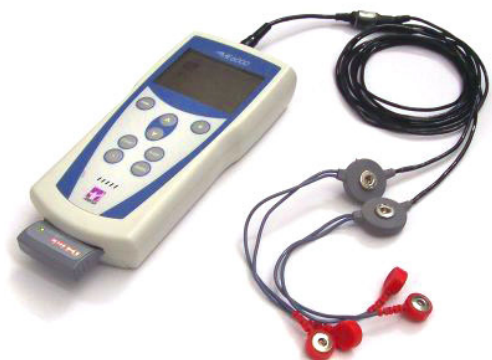

**Figure S1.** Technical specification of Biomonitor ME 6000 16\*.

**Table S1.** Summary of measured values of muscle activity of all probands. MVC avg = maximum voluntary contraction, average from three measurements. Muscle activity values (averages of three measurements), and % of MVC are given for each proband. Proband sex is indicated in the parentheses following their numerical code (M = male, F = female).

|               |                       |               | Muscle activity ( $\mu$ V)  |                               |                          |                            |                                       |                                         |                            |                              | % maximum voluntary contraction |                               |                          |                            |                                       |                                         |                            |                              |
|---------------|-----------------------|---------------|-----------------------------|-------------------------------|--------------------------|----------------------------|---------------------------------------|-----------------------------------------|----------------------------|------------------------------|---------------------------------|-------------------------------|--------------------------|----------------------------|---------------------------------------|-----------------------------------------|----------------------------|------------------------------|
|               |                       |               | m. serratus anterior dexter | m. serratus anterior sinister | m. erector spinae dexter | m. erector spinae sinister | m. obliquus externus abdominis dexter | m. obliquus externus abdominis sinister | m. rectus abdominis dexter | m. rectus abdominis sinister | m. serratus anterior dexter     | m. serratus anterior sinister | m. erector spinae dexter | m. erector spinae sinister | m. obliquus externus abdominis dexter | m. obliquus externus abdominis sinister | m. rectus abdominis dexter | m. rectus abdominis sinister |
| Proband 1 (M) | MVC avg (= 100%)      |               | 256                         | 238                           | 88                       | 116                        | 87                                    | 109                                     | 110                        | 88                           |                                 |                               |                          |                            |                                       |                                         |                            |                              |
|               | 1. Knee elevation avg | gymnastic     | 47                          | 80                            | 57                       | 58                         | 76                                    | 91                                      | 61                         | 73                           | 18                              | 34                            | 64                       | 50                         | 88                                    | 84                                      | 55                         | 83                           |
|               | 2. Rotation avg       | gymnastic     | 131                         | 125                           | 54                       | 55                         | 94                                    | 76                                      | 48                         | 45                           | 51                              | 53                            | 61                       | 47                         | 108                                   | 70                                      | 44                         | 51                           |
|               | 3. Clapping avg       | gymnastic     | 58                          | 66                            | 53                       | 55                         | 116                                   | 103                                     | 71                         | 58                           | 23                              | 28                            | 61                       | 47                         | 133                                   | 95                                      | 65                         | 66                           |
|               | 1. Knee elevation avg | horse in step | 94                          | 151                           | 59                       | 51                         | 122                                   | 102                                     | 73                         | 73                           | 37                              | 64                            | 67                       | 44                         | 140                                   | 94                                      | 66                         | 83                           |
|               | 2. Rotation avg       | horse in step | 86                          | 88                            | 60                       | 49                         | 65                                    | 62                                      | 52                         | 52                           | 34                              | 37                            | 69                       | 42                         | 74                                    | 57                                      | 48                         | 59                           |
|               | 3. Clapping avg       | horse in step | 59                          | 60                            | 63                       | 52                         | 65                                    | 63                                      | 58                         | 56                           | 23                              | 25                            | 72                       | 45                         | 75                                    | 58                                      | 53                         | 64                           |
| Pronand 2 (F) | MVC avg (= 100%)      |               | 70                          | 72                            | 67                       | 71                         | 98                                    | 81                                      | 121                        | 151                          |                                 |                               |                          |                            |                                       |                                         |                            |                              |
|               | 1. Knee elevation avg | gymnastic     | 50                          | 54                            | 55                       | 57                         | 86                                    | 78                                      | 56                         | 54                           | 71                              | 75                            | 82                       | 80                         | 88                                    | 96                                      | 46                         | 36                           |
|               | 2. Rotation avg       | gymnastic     | 65                          | 66                            | 54                       | 55                         | 102                                   | 107                                     | 48                         | 46                           | 92                              | 91                            | 80                       | 77                         | 104                                   | 132                                     | 40                         | 30                           |
|               | 3. Clapping avg       | gymnastic     | 47                          | 56                            | 56                       | 58                         | 153                                   | 123                                     | 105                        | 101                          | 67                              | 78                            | 83                       | 81                         | 156                                   | 152                                     | 87                         | 67                           |
|               | 1. Knee elevation avg | horse in step | 101                         | 91                            | 57                       | 51                         | 89                                    | 61                                      | 55                         | 54                           | 144                             | 127                           | 85                       | 72                         | 91                                    | 76                                      | 45                         | 36                           |
|               | 2. Rotation avg       | horse in step | 96                          | 94                            | 59                       | 51                         | 55                                    | 53                                      | 47                         | 48                           | 137                             | 131                           | 89                       | 72                         | 56                                    | 66                                      | 39                         | 32                           |
|               | 3. Clapping avg       | horse in step | 72                          | 88                            | 61                       | 54                         | 69                                    | 67                                      | 50                         | 51                           | 102                             | 123                           | 91                       | 76                         | 70                                    | 83                                      | 42                         | 34                           |

|               |                       |               |     |     |    |     |     |     |     |     |     |     |     |     |     |     |     |     |
|---------------|-----------------------|---------------|-----|-----|----|-----|-----|-----|-----|-----|-----|-----|-----|-----|-----|-----|-----|-----|
| Proband 3 (M) | MVC avg (= 100%)      |               | 56  | 81  | 55 | 56  | 79  | 65  | 120 | 116 |     |     |     |     |     |     |     |     |
|               | 1. Knee elevation avg | gymnastic     | 56  | 66  | 54 | 54  | 94  | 56  | 57  | 51  | 99  | 81  | 98  | 97  | 119 | 86  | 47  | 44  |
|               | 2. Rotation avg       | gymnastic     | 110 | 108 | 56 | 56  | 76  | 56  | 58  | 54  | 196 | 133 | 101 | 101 | 96  | 86  | 49  | 46  |
|               | 3. Clapping avg       | gymnastic     | 58  | 72  | 54 | 55  | 106 | 71  | 56  | 51  | 104 | 89  | 98  | 99  | 134 | 110 | 47  | 44  |
|               | 1. Knee elevation avg | horse in step | 61  | 66  | 56 | 62  | 96  | 66  | 58  | 56  | 109 | 82  | 101 | 111 | 122 | 102 | 48  | 48  |
|               | 2. Rotation avg       | horse in step | 96  | 97  | 69 | 73  | 89  | 71  | 73  | 75  | 172 | 120 | 125 | 130 | 113 | 109 | 61  | 64  |
|               | 3. Clapping avg       | horse in step | 67  | 74  | 75 | 80  | 107 | 97  | 68  | 66  | 120 | 92  | 137 | 143 | 135 | 150 | 57  | 57  |
| Proband 4 (F) | MVC avg (= 100%)      |               | 71  | 73  | 64 | 68  | 57  | 57  | 83  | 76  |     |     |     |     |     |     |     |     |
|               | 1. Knee elevation avg | gymnastic     | 45  | 52  | 53 | 54  | 56  | 52  | 68  | 60  | 63  | 72  | 83  | 79  | 98  | 91  | 82  | 79  |
|               | 2. Rotation avg       | gymnastic     | 62  | 62  | 53 | 56  | 54  | 49  | 50  | 49  | 88  | 85  | 83  | 83  | 95  | 85  | 61  | 65  |
|               | 3. Clapping avg       | gymnastic     | 45  | 54  | 54 | 55  | 63  | 84  | 117 | 110 | 63  | 74  | 85  | 81  | 110 | 148 | 141 | 144 |
|               | 1. Knee elevation avg | horse in step | 69  | 72  | 57 | 46  | 90  | 91  | 82  | 68  | 98  | 99  | 89  | 68  | 157 | 160 | 99  | 89  |
|               | 2. Rotation avg       | horse in step | 81  | 70  | 56 | 49  | 64  | 68  | 49  | 50  | 115 | 95  | 88  | 72  | 113 | 119 | 59  | 66  |
|               | 3. Clapping avg       | horse in step | 84  | 101 | 61 | 52  | 95  | 83  | 101 | 79  | 118 | 138 | 95  | 77  | 166 | 145 | 121 | 104 |
| Proband 5 (M) | MVC avg (= 100%)      |               | 416 | 131 | 98 | 103 | 63  | 124 | 71  | 68  |     |     |     |     |     |     |     |     |
|               | 1. Knee elevation avg | gymnastic     | 46  | 64  | 58 | 68  | 113 | 104 | 79  | 74  | 11  | 49  | 59  | 66  | 179 | 84  | 112 | 109 |
|               | 2. Rotation avg       | gymnastic     | 90  | 139 | 56 | 62  | 72  | 65  | 52  | 46  | 22  | 106 | 57  | 60  | 114 | 52  | 73  | 68  |
|               | 3. Clapping avg       | gymnastic     | 56  | 87  | 59 | 62  | 139 | 103 | 152 | 131 | 13  | 66  | 60  | 60  | 220 | 83  | 215 | 193 |
|               | 1. Knee elevation avg | horse in step | 114 | 103 | 57 | 48  | 319 | 207 | 94  | 98  | 27  | 79  | 59  | 46  | 506 | 167 | 132 | 144 |
|               | 2. Rotation avg       | horse in step | 88  | 99  | 67 | 56  | 135 | 88  | 63  | 53  | 21  | 76  | 68  | 54  | 215 | 71  | 89  | 78  |
|               | 3. Clapping avg       | horse in step | 71  | 73  | 66 | 63  | 98  | 75  | 85  | 78  | 17  | 56  | 68  | 61  | 156 | 60  | 120 | 115 |
| Proband 6 (F) | MVC avg (= 100%)      |               | 76  | 69  | 68 | 69  | 73  | 65  | 62  | 69  |     |     |     |     |     |     |     |     |
|               | 1. Knee elevation avg | gymnastic     | 53  | 59  | 52 | 54  | 70  | 72  | 58  | 58  | 70  | 86  | 77  | 78  | 96  | 111 | 93  | 84  |
|               | 2. Rotation avg       | gymnastic     | 63  | 63  | 53 | 55  | 80  | 85  | 49  | 46  | 83  | 92  | 77  | 79  | 110 | 131 | 78  | 67  |
|               | 3. Clapping avg       | gymnastic     | 65  | 79  | 56 | 56  | 94  | 93  | 96  | 108 | 86  | 115 | 83  | 81  | 129 | 144 | 155 | 156 |
|               | 1. Knee elevation avg | horse in step | 101 | 115 | 55 | 53  | 107 | 97  | 82  | 79  | 133 | 167 | 81  | 77  | 147 | 149 | 132 | 115 |
|               | 2. Rotation avg       | horse in step | 84  | 128 | 53 | 51  | 79  | 74  | 51  | 55  | 111 | 185 | 78  | 74  | 108 | 114 | 83  | 80  |
|               | 3. Clapping avg       | horse in step | 65  | 87  | 61 | 59  | 82  | 82  | 68  | 74  | 86  | 126 | 89  | 86  | 113 | 127 | 110 | 107 |
| Proband 7 (F) | MVC avg (= 100%)      |               | 109 | 73  | 85 | 84  | 63  | 57  | 51  | 46  |     |     |     |     |     |     |     |     |

|               |                       |               |     |     |     |     |     |     |     |     |     |     |    |    |     |     |     |     |
|---------------|-----------------------|---------------|-----|-----|-----|-----|-----|-----|-----|-----|-----|-----|----|----|-----|-----|-----|-----|
|               | 1. Knee elevation avg | gymnastic     | 48  | 58  | 56  | 64  | 85  | 58  | 66  | 57  | 44  | 80  | 66 | 76 | 135 | 102 | 129 | 123 |
|               | 2. Rotation avg       | gymnastic     | 55  | 63  | 53  | 54  | 62  | 54  | 49  | 47  | 51  | 86  | 62 | 64 | 98  | 94  | 97  | 103 |
|               | 3. Clapping avg       | gymnastic     | 49  | 59  | 58  | 59  | 135 | 81  | 136 | 102 | 45  | 80  | 69 | 71 | 214 | 142 | 267 | 222 |
|               | 1. Knee elevation avg | horse in step | 119 | 105 | 61  | 58  | 76  | 99  | 93  | 81  | 109 | 144 | 71 | 69 | 121 | 174 | 182 | 175 |
|               | 2. Rotation avg       | horse in step | 92  | 98  | 55  | 48  | 63  | 68  | 53  | 55  | 84  | 134 | 65 | 57 | 100 | 119 | 105 | 119 |
|               | 3. Clapping avg       | horse in step | 104 | 88  | 70  | 63  | 120 | 108 | 162 | 154 | 96  | 120 | 82 | 75 | 191 | 189 | 318 | 335 |
| Proband 8 (M) | MVC avg (= 100%)      |               | 148 | 178 | 81  | 76  | 72  | 70  | 91  | 77  |     |     |    |    |     |     |     |     |
|               | 1. Knee elevation avg | gymnastic     | 47  | 59  | 55  | 58  | 63  | 53  | 64  | 53  | 32  | 33  | 68 | 77 | 88  | 76  | 70  | 69  |
|               | 2. Rotation avg       | gymnastic     | 85  | 72  | 54  | 53  | 56  | 47  | 48  | 45  | 58  | 41  | 67 | 70 | 77  | 67  | 53  | 58  |
|               | 3. Clapping avg       | gymnastic     | 51  | 66  | 58  | 59  | 71  | 60  | 101 | 86  | 34  | 37  | 71 | 77 | 99  | 86  | 111 | 111 |
|               | 1. Knee elevation avg | horse in step | 58  | 71  | 64  | 72  | 75  | 69  | 81  | 70  | 39  | 40  | 79 | 94 | 104 | 99  | 89  | 91  |
|               | 2. Rotation avg       | horse in step | 95  | 87  | 67  | 63  | 63  | 58  | 58  | 61  | 64  | 49  | 83 | 83 | 88  | 83  | 64  | 80  |
|               | 3. Clapping avg       | horse in step | 63  | 75  | 69  | 68  | 85  | 83  | 104 | 102 | 43  | 42  | 85 | 89 | 118 | 119 | 114 | 132 |
| Proband 9 (M) | MVC avg (= 100%)      |               | 200 | 213 | 101 | 123 | 118 | 101 | 188 | 185 |     |     |    |    |     |     |     |     |
|               | 1. Knee elevation avg | gymnastic     | 45  | 53  | 52  | 53  | 75  | 64  | 68  | 61  | 23  | 25  | 51 | 43 | 64  | 64  | 36  | 33  |
|               | 2. Rotation avg       | gymnastic     | 75  | 199 | 53  | 55  | 61  | 57  | 48  | 45  | 37  | 93  | 52 | 44 | 51  | 56  | 26  | 24  |
|               | 3. Clapping avg       | gymnastic     | 52  | 62  | 52  | 53  | 84  | 62  | 95  | 80  | 26  | 29  | 51 | 43 | 71  | 61  | 50  | 43  |
|               | 1. Knee elevation avg | horse in step | 63  | 58  | 62  | 63  | 81  | 71  | 80  | 69  | 32  | 27  | 61 | 51 | 68  | 71  | 42  | 37  |
|               | 2. Rotation avg       | horse in step | 87  | 87  | 80  | 70  | 83  | 74  | 58  | 56  | 43  | 41  | 79 | 57 | 70  | 73  | 31  | 30  |
|               | 3. Clapping avg       | horse in step | 57  | 63  | 81  | 77  | 82  | 78  | 97  | 92  | 29  | 30  | 80 | 63 | 69  | 77  | 52  | 50  |
